# Supplementary material for: Identification of a Novel Five-Gene Signature as a Prognostic and Diagnostic Biomarker in Colorectal Cancers
Source: MDPI journal article supplement (doi:10.3390/ijms23020793), 2022-01-12
Supplement: s1 [file s1]

*Supplementary material*

# **Identification of a Novel Five-Gene Signature as a Prognostic and Diagnostic Biomarker in Colorectal Cancers**

Souvik Ghatak, Syrina F. Mehrabi, Lubna M. Mehdawi, Shakti Ranjan Satapathy  
and Anita Sjölander \*

## In-silico Training Cohort – TCGA-COADREAD (N = 324)

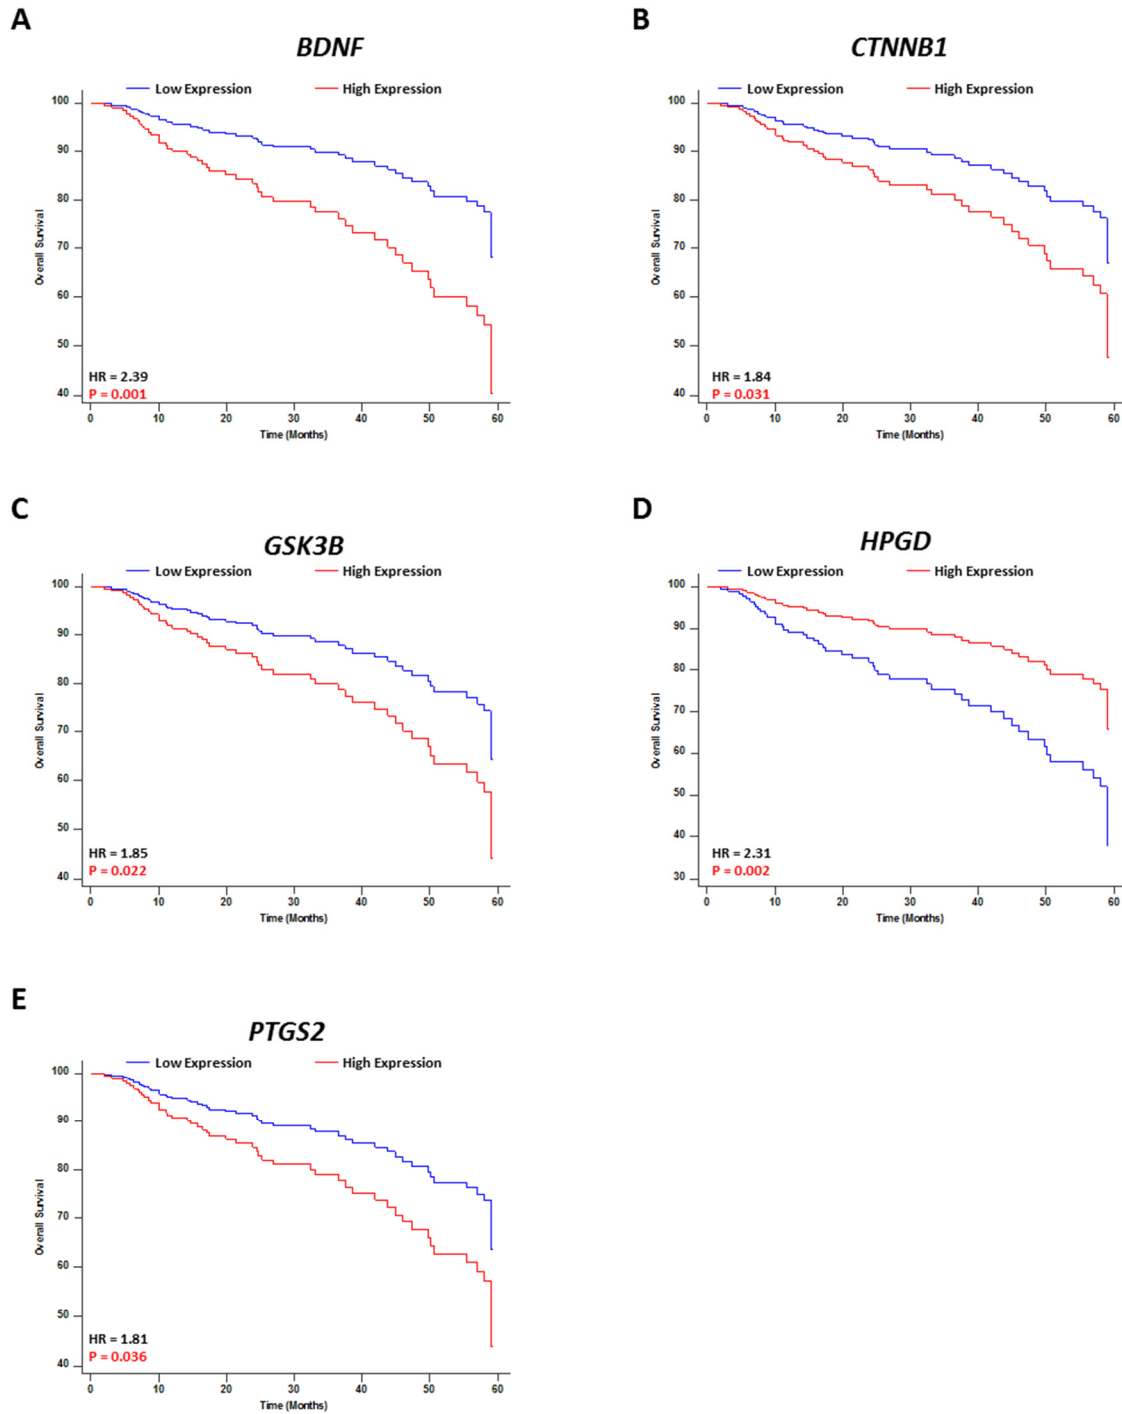

**Figure S1.** Kaplan–Meier survival plots for overall survival stratified by cox-ph univariate analysis for *BDNF* (A), *CTNNB1* (B), *GSK3B* (C), *HPGD* (D) and *PTGS2* (E) in silico training cohort (TCGA-COADREAD).

## In-silico Validation Cohort - GSE39582 (N = 473)

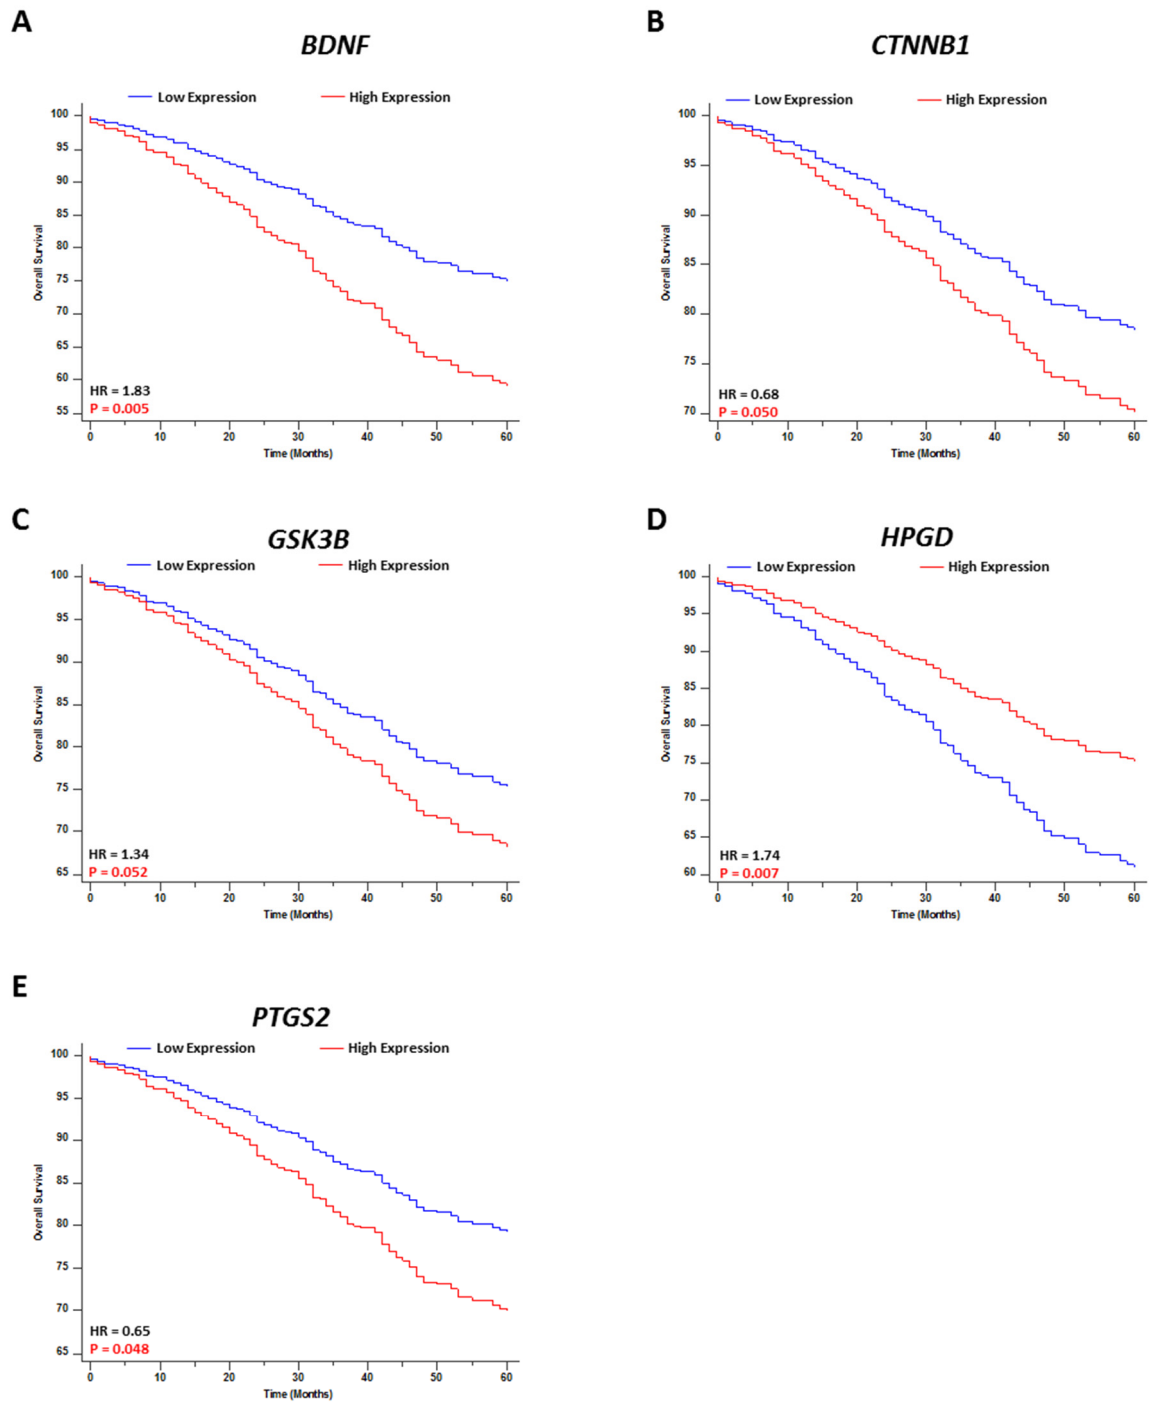

**Figure S2.** Kaplan–Meier survival plots for overall survival stratified by cox-ph univariate analysis for *BDNF* (A), *CTNNB1* (B), *GSK3B* (C), *HPGD* (D) and *PTGS2* (E) in silico validation cohort (GSE39582).

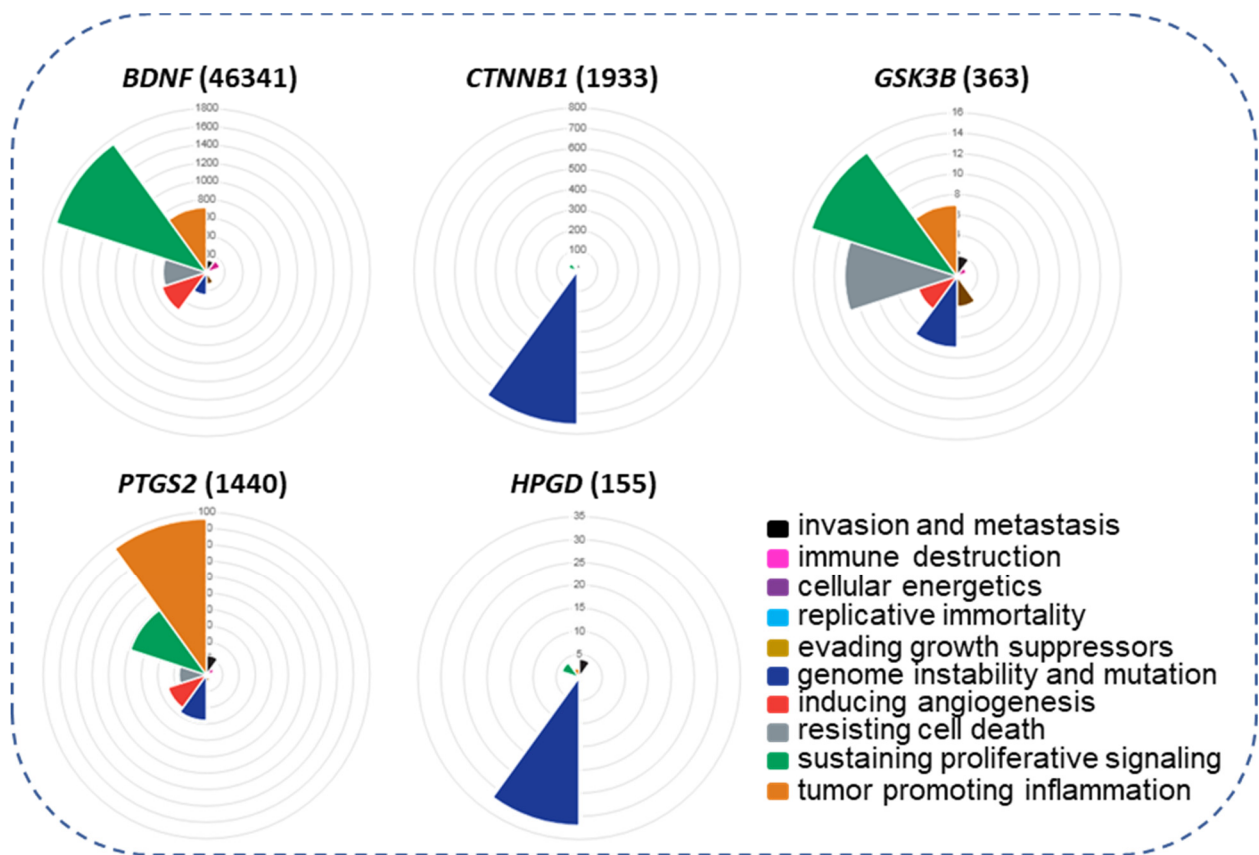

**Figure S3.** The role of *BDNF*, *CTNNB1*, *GSK3B*, *PTGS2* and *HPGD* in different cancer hallmarks based on the different datasets and publications (based on Cancer Hallmarks Analytics Tool (CHAT); <http://chat.lionproject.net>).

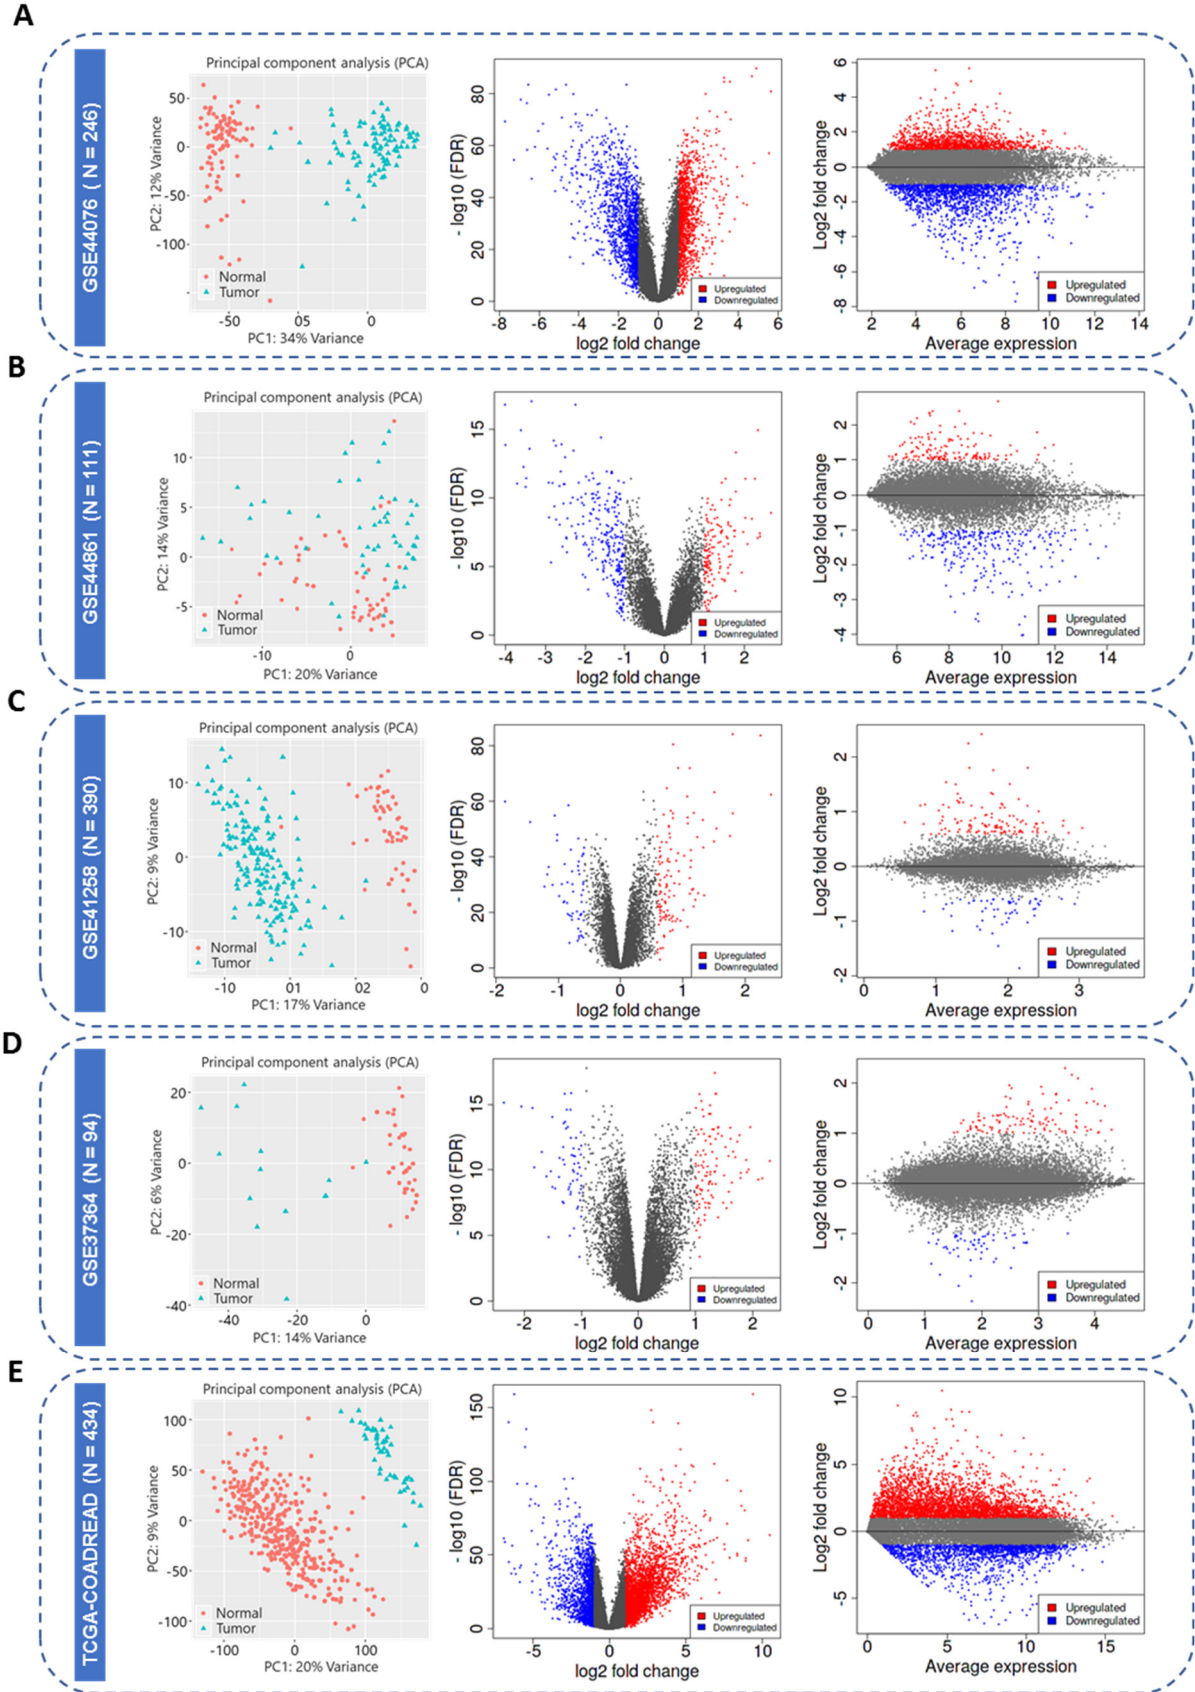

**Figure S4.** PCA and volcano plot of in silico discovery and training microarray and RNA-seq datasets. (A) GSE44076, (B) GSE44861, (C) GSE41258, (D) GSE37364, (E) TCGA-COADREAD.
